# Supplementary material
Source: ML conference proceedings conference paper supplement (https://proceedings.mlr.press/v89/huyuk19a.html)
Supplement: Supplementary file 1 [file huyuk19a-supp.pdf]

## A SUPPLEMENTAL DOCUMENT

### A.1 Additional Numerical Results

We provide additional results for the disjunctive version of the problem that is introduced in Section 5. We consider the class of problems  $B_{\text{LB}}(R, K, p, \Delta)$  described in [20], where  $L = 1$  and the probability that user 1 finds page  $j$  attractive is given as

$$p_{1,j} = \begin{cases} p & \text{if } j \leq K \\ p - \Delta & \text{otherwise.} \end{cases}$$

Similar to [20], we set  $p = 0.2$  and vary other parameters, namely  $R$ ,  $K$ , and  $\Delta$ . We run both CTS and CUCB for 100000 rounds in all problem instances, and report their regrets averaged over 20 runs in Table 1.

Table 1: Average regret and its standard deviation for CTS and CUCB for the class of problems  $B_{\text{LB}}(R, K, 0.2, \Delta)$ .

| $R$ | $K$ | $\Delta$ | CTS    |           | CUCB   |           |
|-----|-----|----------|--------|-----------|--------|-----------|
|     |     |          | Regret | Std. Dev. | Regret | Std. Dev. |
| 16  | 2   | 0.15     | 155.4  | 14.1      | 1284.1 | 52.4      |
| 16  | 4   | 0.15     | 103.2  | 9.0       | 998.9  | 33.2      |
| 16  | 8   | 0.15     | 52.1   | 9.8       | 549.5  | 16.8      |
| 32  | 2   | 0.15     | 321.4  | 18.9      | 2718.8 | 61.2      |
| 32  | 4   | 0.15     | 252.2  | 17.0      | 2227.0 | 55.4      |
| 32  | 8   | 0.15     | 155.4  | 25.7      | 1531.0 | 21.9      |
| 16  | 2   | 0.075    | 276.9  | 50.7      | 2057.6 | 79.6      |
| 16  | 4   | 0.075    | 205.4  | 25.7      | 1496.5 | 65.2      |
| 16  | 8   | 0.075    | 113.1  | 40.4      | 719.4  | 53.7      |

We observe that CTS outperforms CUCB in all problem instances in terms of the average regret. Next, we compare the performance of CTS with CascadeKL-UCB proposed in [20] using the results reported in Table 1 in [20]. We observe that CTS outperforms CascadeKL-UCB in all problem instances as well. As a final remark, we see that for both CTS and CUCB, the regret increases as the number of pages ( $R$ ) increases, decreases as the number of recommended items ( $K$ ) increases, and increases as  $\Delta$  decreases.

### A.2 Additional Facts

We introduce Fact 2 in order to bound the expression in Lemma 1 and Fact 3 in order to bound the expression in Lemma 3.

**Fact 2.** (Multiplicative Chernoff Bound ([21] and [13])) Let  $X_1, \dots, X_n$  be Bernoulli random variables taking values in  $\{0, 1\}$  such that  $\mathbb{E}[X_t | X_1, \dots, X_{t-1}] \geq \mu$  for all  $t \leq n$ , and  $Y = X_1 + \dots + X_n$ . Then, for all  $\delta \in (0, 1)$ ,

$$\Pr[Y \leq (1 - \delta)n\mu] \leq e^{-\frac{\delta^2 n\mu}{2}}.$$

**Fact 3.** (Results from Lemma 7 in [12]) Given  $Z \subseteq \tilde{S}^*$ , let  $\tau_j$  be the round at which  $\mathcal{E}_{Z,1}(\boldsymbol{\theta}(t)) \wedge \neg \mathcal{E}_{Z,2}(\boldsymbol{\theta}(t))$  occurs for the  $j$ th time, and let  $\tau_0 = 0$ . If  $\forall i \in Z, N_i(\tau_j + 1) \geq q$  and  $0 < \varepsilon \leq 1/\sqrt{e}$ , then

$$\mathbb{E} \left[ \sum_{t=\tau_j+1}^{\tau_{j+1}} \mathbb{I}\{\mathcal{E}_{Z,1}(\boldsymbol{\theta}(t)), \mathcal{E}_{Z,2}(\boldsymbol{\theta}(t))\} \right] \leq \prod_{i \in Z} B_q - 1 \quad (16)$$

where  $B_q$  is given as

$$B_q = \begin{cases} \min \left\{ \frac{4}{\varepsilon^2}, 1 + 6\alpha'_1 \frac{1}{\varepsilon^2} e^{-\frac{\varepsilon^2}{2}q} + \frac{2}{e^{\frac{1}{8}\varepsilon^2q-2}} \right\} & \text{if } q > \frac{8}{\varepsilon^2} \\ \frac{4}{\varepsilon^2} & \text{otherwise} \end{cases}$$

and  $\alpha'_1$  is a problem independent constant.

Moreover,

$$\sum_{q=0}^T \left( \prod_{i \in Z} B_q - 1 \right) \leq 13\alpha'_2 \left( \frac{2^{2|Z|+3} \log \frac{|Z|}{\varepsilon^2}}{\varepsilon^{2|Z|+2}} \right) \quad (17)$$

where  $\alpha'_2$  is a problem independent constant.

### A.3 Proof of Lemma 1

The proof is similar to the proof of Lemma 3 in [12]. However, additional steps are required to take probabilistic triggering into account. Consider a base arm  $i \in [m]$ . Let  $\tau_w^i$  be the round for which base arm  $i$  is in the triggering set of the selected super arm for the  $w$ th time. Hence, we have  $i \in \tilde{S}(\tau_w^i)$  for all  $w > 0$ . Also let  $\tau_0^i = 0$ . Then, we have:

$$\begin{aligned} & \mathbb{E}[\mathbb{I}\{t : 1 \leq t \leq T, i \in \tilde{S}(t), |\hat{\mu}_i(t) - \mu_i| > \varepsilon \vee \mathcal{B}_{i,2}(t)\}] \\ &= \mathbb{E} \left[ \sum_{t=1}^T \mathbb{I}\{i \in \tilde{S}(t), |\hat{\mu}_i(t) - \mu_i| > \varepsilon \vee \mathcal{B}_{i,2}(t)\} \right] \\ &\leq \mathbb{E} \left[ \sum_{w=0}^T \sum_{t=\tau_w^i+1}^{\tau_{w+1}^i} \mathbb{I}\{i \in \tilde{S}(t), |\hat{\mu}_i(t) - \mu_i| > \varepsilon \vee \mathcal{B}_{i,2}(t)\} \right] \\ &= \sum_{w=0}^T \mathbb{E}[\mathbb{I}\{i \in \tilde{S}(\tau_{w+1}^i), |\hat{\mu}_i(\tau_{w+1}^i) - \mu_i| > \varepsilon \vee \mathcal{B}_{i,2}(\tau_{w+1}^i)\}] \\ &= \sum_{w=0}^T \mathbb{E}[\mathbb{I}\{|\hat{\mu}_i(\tau_{w+1}^i) - \mu_i| > \varepsilon \vee \mathcal{B}_{i,2}(\tau_{w+1}^i)\}] \\ &\leq 1 + \sum_{w=1}^T \Pr[|\hat{\mu}_i(\tau_{w+1}^i) - \mu_i| > \varepsilon \vee \mathcal{B}_{i,2}(\tau_{w+1}^i)] \\ &= 1 + \sum_{w=1}^T \Pr[|\hat{\mu}_i(\tau_{w+1}^i) - \mu_i| > \varepsilon \wedge \neg \mathcal{B}_{i,2}(\tau_{w+1}^i)] + \sum_{w=1}^T \Pr[\mathcal{B}_{i,2}(\tau_{w+1}^i)] \\ &= 1 + \sum_{w=1}^T \Pr[|\hat{\mu}_i(\tau_{w+1}^i) - \mu_i| > \varepsilon, N_i(\tau_{w+1}^i) > (1-\rho)wp_i] + \sum_{w=1}^T \Pr[N_i(\tau_{w+1}^i) \leq (1-\rho)wp_i] \\ &\leq 1 + \sum_{w=1}^T \Pr[|\hat{\mu}_i(\tau_{w+1}^i) - \mu_i| > \varepsilon, N_i(\tau_{w+1}^i) > (1-\rho)wp^*] + \sum_{w=1}^T \Pr[N_i(\tau_{w+1}^i) \leq (1-\rho)wp_i] \\ &\leq 1 + \sum_{w=1}^T 2e^{-2(1-\rho)wp^*\varepsilon^2} + \mathbb{I}\{p^* < 1\} \cdot \sum_{w=1}^T e^{-\frac{\rho^2 wp^*}{2}} \\ &\leq 1 + \frac{1}{(1-\rho)p^*\varepsilon^2} + \frac{2\mathbb{I}\{p^* < 1\}}{\rho^2 p^*} \end{aligned} \quad (18)$$

where the second term in (18) is obtained by observing that

$$\begin{aligned} & \Pr[|\hat{\mu}_i(\tau_{w+1}^i) - \mu_i| > \varepsilon, N_i(\tau_{w+1}^i) > (1-\rho)wp^*] \\ &\leq \sum_{k=\lceil (1-\rho)wp^* \rceil}^{\infty} \Pr[|\hat{\mu}_i(\tau_{w+1}^i) - \mu_i| > \varepsilon | N_i(\tau_{w+1}^i) = k] \Pr[N_i(\tau_{w+1}^i) = k] \end{aligned}$$

and applying Hoeffding's inequality, and the third term in (18) is obtained by using Fact 2.

#### A.4 Proof of Lemma 2

The proof is similar to the proof of Lemma 1 in [12]. Let  $\boldsymbol{\theta}' := (\boldsymbol{\theta}'_{\tilde{S}^*}, \boldsymbol{\theta}_{\tilde{S}^{*c}}(t))$  be such that

$$\|\boldsymbol{\theta}'_{\tilde{S}^*} - \boldsymbol{\mu}_{\tilde{S}^*}\|_\infty \leq \varepsilon. \quad (19)$$

**Claim 1:** For all  $S'$  such that  $\tilde{S}' \cap \tilde{S}^* = \emptyset$ ,  $S' \neq \text{Oracle}(\boldsymbol{\theta}')$ .

Claim 1 holds since

$$r(S', \boldsymbol{\theta}') = r(S', \boldsymbol{\theta}(t)) \quad (20)$$

$$\leq r(S(t), \boldsymbol{\theta}(t)) \quad (21)$$

$$\leq r(S(t), \boldsymbol{\mu}) + B \left( \frac{\Delta_{S(t)}}{B} - (\tilde{k}^{*2} + 1)\varepsilon \right) \quad (22)$$

$$= r(S(t), \boldsymbol{\mu}) + \Delta_{S(t)} - B(\tilde{k}^{*2} + 1)\varepsilon$$

$$= r(S^*, \boldsymbol{\mu}) - B(\tilde{k}^{*2} + 1)\varepsilon \quad (23)$$

$$< r(S^*, \boldsymbol{\mu}) - B\tilde{k}^*\varepsilon$$

$$\leq r(S^*, \boldsymbol{\theta}') \quad (24)$$

where (20) follows from Assumption 3 since  $\boldsymbol{\theta}'$  and  $\boldsymbol{\theta}(t)$  only differ on arms in  $\tilde{S}^*$  and  $\tilde{S}' \cap \tilde{S}^* = \emptyset$ , (21) holds since  $S(t) \in \text{OPT}(\boldsymbol{\theta}(t))$ , (22) is by  $\neg\mathcal{D}(t)$  and Assumption 3, (23) is by the definition of  $\Delta_{S(t)}$ , and (24) is again by Assumption 3.

Next, we consider two cases:

**Case 1a:**  $\tilde{S}^* \subseteq \text{Oracle}(\boldsymbol{\theta}')$  for all  $\boldsymbol{\theta}' = (\boldsymbol{\theta}'_{\tilde{S}^*}, \boldsymbol{\theta}_{\tilde{S}^{*c}}(t))$  that satisfies (19).

**Case 1b:** There exists  $\boldsymbol{\theta}' = (\boldsymbol{\theta}'_{\tilde{S}^*}, \boldsymbol{\theta}_{\tilde{S}^{*c}}(t))$  that satisfies (19) for which  $\tilde{S}^* \not\subseteq \text{Oracle}(\boldsymbol{\theta}')$ . For this  $\boldsymbol{\theta}'$ , let  $S_1 = \text{Oracle}(\boldsymbol{\theta}')$  and  $Z_1 = \tilde{S}_1 \cap \tilde{S}^*$ . Together with Claim 1, for this case, we have  $Z_1 \neq \tilde{S}^*$  and  $Z_1 \neq \emptyset$ .

Note that Case 1a and Case 1b are complements of each other.

When Case 1a is true, for any given  $\boldsymbol{\theta}'$ , with an abuse of notation, let  $S_0 := \text{Oracle}(\boldsymbol{\theta}')$ . Then, we have  $r(S_0, \boldsymbol{\theta}') \geq r(S^*, \boldsymbol{\theta}') \geq r(S^*, \boldsymbol{\mu}) - B\tilde{k}^*\varepsilon$ . If  $S_0 \notin \text{OPT}$ , then we have  $r(S^*, \boldsymbol{\mu}) = r(S_0, \boldsymbol{\mu}) + \Delta_{S_0}$ . Combining the two results above, we obtain  $r(S_0, \boldsymbol{\theta}') \geq r(S_0, \boldsymbol{\mu}) + \Delta_{S_0} - B\tilde{k}^*\varepsilon$ . By Assumption 3, this implies that  $\|\boldsymbol{\theta}'_{\tilde{S}_0} - \boldsymbol{\mu}_{\tilde{S}_0}\|_1 \geq \frac{\Delta_{S_0}}{B} - \tilde{k}^*\varepsilon > \frac{\Delta_{S_0}}{B} - (\tilde{k}^{*2} + 1)\varepsilon$ . Thus, from the discussion above, we conclude that either  $S_0 \in \text{OPT}$  or  $\|\boldsymbol{\theta}'_{\tilde{S}_0} - \boldsymbol{\mu}_{\tilde{S}_0}\|_1 > \frac{\Delta_{S_0}}{B} - (\tilde{k}^{*2} + 1)\varepsilon$ . This means  $\mathcal{E}_{\tilde{S}^*, 1}(\boldsymbol{\theta}') = \mathcal{E}_{\tilde{S}^*, 1}(\boldsymbol{\theta}(t))$  holds. Hence, if Case 1a is true, then Lemma 2 holds for  $Z = \tilde{S}^*$ .

In Case 1b, we also have  $r(S_1, \boldsymbol{\theta}') \geq r(S^*, \boldsymbol{\theta}') \geq r(S^*, \boldsymbol{\mu}) - B\tilde{k}^*\varepsilon$ . Consider any  $\boldsymbol{\theta}'' = (\boldsymbol{\theta}''_{Z_1}, \boldsymbol{\theta}_{Z_1^c}(t))$  such that

$$\|\boldsymbol{\theta}''_{Z_1} - \boldsymbol{\mu}_{Z_1}\|_\infty \leq \varepsilon. \quad (25)$$

We see that

$$\begin{aligned} \|\boldsymbol{\theta}''_{\tilde{S}_1} - \boldsymbol{\theta}'_{\tilde{S}_1}\|_1 &= \sum_{i \in \tilde{S}_1 \cap \tilde{S}^*} |\theta''_i - \theta'_i| + \sum_{i \in \tilde{S}_1 \cap \tilde{S}^{*c}} |\theta''_i - \theta'_i| \\ &\leq \sum_{i \in Z_1} (|\theta''_i - \mu_i| + |\mu_i - \theta'_i|) \\ &\leq 2(\tilde{k}^* - 1)\varepsilon \end{aligned}$$

hence  $r(S_1, \boldsymbol{\theta}'') \geq r(S_1, \boldsymbol{\theta}') - 2B(\tilde{k}^* - 1)\varepsilon \geq r(S^*, \boldsymbol{\mu}) - B\tilde{k}^*\varepsilon - 2B(\tilde{k}^* - 1)\varepsilon = r(S^*, \boldsymbol{\mu}) - B(3\tilde{k}^* - 2)\varepsilon$ .

**Claim 2:** For all  $S'$  such that  $\tilde{S}' \cap Z_1 = \emptyset$ ,  $S' \neq \text{Oracle}(\boldsymbol{\theta}'')$ .

Similar to Claim 1, Claim 2 holds since

$$r(S', \boldsymbol{\theta}'') = r(S', \boldsymbol{\theta}(t))$$

$$\begin{aligned}
 &\leq r(S(t), \boldsymbol{\theta}(t)) \\
 &\leq r(S(t), \boldsymbol{\mu}) + B \left( \frac{\Delta_{S(t)}}{B} - (\tilde{k}^{*2} + 1)\varepsilon \right) \\
 &= r(S(t), \boldsymbol{\mu}) + \Delta_{S(t)} - B(\tilde{k}^{*2} + 1)\varepsilon \\
 &= r(S^*, \boldsymbol{\mu}) - B(\tilde{k}^{*2} + 1)\varepsilon \\
 &< r(S^*, \boldsymbol{\mu}) - B(3\tilde{k}^* - 2)\varepsilon \\
 &\leq r(S_1, \boldsymbol{\theta}'').
 \end{aligned}$$

Claim 2 implies that when Case 1b holds, we have  $\text{Oracle}(\boldsymbol{\theta}'') \cap Z_1 \neq \emptyset$ . Hence, we consider two cases again for  $\text{Oracle}(\boldsymbol{\theta}'')$ :

**Case 2a:**  $Z_1 \subseteq \text{Oracle}(\boldsymbol{\theta}'')$  for all  $\boldsymbol{\theta}'' = (\boldsymbol{\theta}''_{Z_1}, \boldsymbol{\theta}_{Z_1^c}(t))$  that satisfies (25).

**Case 2b:** There exists  $\boldsymbol{\theta}'' = (\boldsymbol{\theta}''_{Z_1}, \boldsymbol{\theta}_{Z_1^c}(t))$  that satisfies (25) for which  $Z_1 \not\subseteq \text{Oracle}(\boldsymbol{\theta}'')$ . For this  $\boldsymbol{\theta}''$  let  $S_2 = \text{Oracle}(\boldsymbol{\theta}'')$  and  $Z_2 = \tilde{S}_2 \cap Z_1$ . Together with Claim 2, for this case, we have  $Z_2 \neq Z_1$  and  $Z_2 \neq \emptyset$ .

Similar to Case 1a, when Case 2a is true, then Lemma 2 holds for  $Z = Z_1$ . Thus, we can keep repeating the same arguments iteratively, and the size of  $Z_i$  will decrease by at least 1 at each iteration. After at most  $\tilde{k}^* - 1$  iterations, Case (·)b will not be possible. In order to see this, suppose that we come to a point where  $|Z_i| = 1$ . As in all iterations, either Case(i+1)a or Case(i+1)b must hold. However, when Case(i+1)b holds, Claim  $i+1$ , which follows from Case(i)b, implies that there exists a  $Z_{i+1} \subseteq Z_i$  such that  $Z_{i+1} \neq \emptyset$  and  $Z_{i+1} \neq Z_i$ , which is not possible when  $|Z_i| = 1$ . Therefore, we conclude that some Case (i+1)a must hold, where  $Z_i \subseteq \tilde{S}^*$ ,  $Z_i \neq \emptyset$ , and  $\mathcal{E}_{Z_i,1}(\boldsymbol{\theta}(t))$  occurs.

Finally, we need to show that Claim  $i+1$  holds for all iterations. We focus on the claim

$$r(S^*, \boldsymbol{\mu}) - B(\tilde{k}^{*2} + 1)\varepsilon < r(S^*, \boldsymbol{\mu}) - B(\tilde{k}^* + 2) \sum_{k=1}^i (\tilde{k}^* - k)\varepsilon$$

as repeating other arguments for all iterations is straightforward. The given inequality is true as  $\tilde{k}^* + 2 \sum_{k=1}^i (\tilde{k}^* - k) \leq \tilde{k}^* + 2 \sum_{k=1}^{\tilde{k}^*-1} (\tilde{k}^* - k) = \tilde{k}^{*2} < \tilde{k}^{*2} + 1$ . Note that, when checking Claim  $i+1$ , we know that  $i$  previous iterations have passed, hence  $\tilde{k}^*$  must be larger than  $i+1$ .

### A.5 Proof of Lemma 3

Given  $Z$ , we re-index the base arms in  $Z$  such that  $z_i$  represents  $i$ th base arm in  $Z$ . We also introduce a counter  $c(t)$ , and let  $c(1) = 1$ . If at round  $t$ ,  $\mathcal{E}_{Z,1}(\boldsymbol{\theta}(t)) \wedge \neg \mathcal{E}_{Z,2}(\boldsymbol{\theta}(t))$  occurs and a feedback for  $z_{c(t)}$  is observed, i.e.,  $z_{c(t)} \in S'(t)$ , the counter is updated with probability  $p^*/p_{z_{c(t)}}^{S(t)}$  in the following way:

$$c(t+1) = \begin{cases} c(t) + 1 & \text{if } c(t) < |Z| \\ 1 & \text{if } c(t) = |Z| \end{cases}$$

If the counter is not updated at round  $t$ ,  $c(t+1) = c(t)$ . Note that when  $\mathcal{E}_{Z,1}(\boldsymbol{\theta}(t)) \wedge \neg \mathcal{E}_{Z,2}(\boldsymbol{\theta}(t))$  occurs,  $z_{c(t)} \in Z \subseteq \text{Oracle}(\boldsymbol{\theta}(t)) = \tilde{S}(t)$ , hence we always have  $0 < p^*/p_{z_{c(t)}}^{S(t)} \leq 1$ . Moreover, the probability that the counter is updated, i.e.,  $c(t+1) \neq c(t)$ , given  $\mathcal{E}_{Z,1}(\boldsymbol{\theta}(t)) \wedge \neg \mathcal{E}_{Z,2}(\boldsymbol{\theta}(t))$  occurs is constant and equal to  $p^*$  for all rounds  $t$  for which  $\mathcal{E}_{Z,1}(\boldsymbol{\theta}(t)) \wedge \neg \mathcal{E}_{Z,2}(\boldsymbol{\theta}(t))$  occurs. To see this, consider a parameter vector  $\boldsymbol{\theta}$  such that  $\mathcal{E}_{Z,1}(\boldsymbol{\theta}) \wedge \neg \mathcal{E}_{Z,2}(\boldsymbol{\theta})$  holds and let  $S = \text{Oracle}(\boldsymbol{\theta})$ , then  $\Pr[c(t+1) \neq c(t) | \boldsymbol{\theta}(t) = \boldsymbol{\theta}] = \Pr[z_{c(t)} \in S'(t) | S(t) = S] \cdot (p^*/p_{z_{c(t)}}^S) = p_{z_{c(t)}}^S \cdot (p^*/p_{z_{c(t)}}^S) = p^*$ .

Let  $\tau_j$  be the round at which  $\mathcal{E}_{Z,1}(\boldsymbol{\theta}(t)) \wedge \neg \mathcal{E}_{Z,2}(\boldsymbol{\theta}(t))$  occurs for the  $j$ th time, and let  $\tau_0 := 0$ . Then, the counter is updated only at rounds  $\tau_j$  with probability  $p^*$ . Let  $\eta_{q,k}$  be the round  $\tau_j$  such that  $c(\tau_j + 1) = k + 1$  and  $c(\tau_j) = k$  holds for the  $(q+1)$ th time. Let  $\eta_{0,0} = 0$  and  $\eta_{q,|Z|} = \eta_{q+1,0}$ . We know that  $0 = \eta_{0,0} < \eta_{0,1} < \dots < \eta_{0,|Z|} = \eta_{1,0} < \eta_{1,1} < \dots$

We use two important observations to continue with proof. Firstly, due to the way the counter is updated, for  $t \geq \eta_{q,0} + 1$  we have  $N_i(t) \geq q$ ,  $\forall i \in Z$ . Secondly, for non-negative integers  $j_1$  and  $j_2$ ,  $\Pr[\eta_{q,k+1} = \tau_{j_1+j_2+1} | \eta_{q,k} =$

$\tau_{j_1}] = p^*(1-p^*)^{j_2}$ . This holds since for the given event to hold, the counter must not be updated at rounds  $\tau_{j_1+1}, \tau_{j_1+2}, \dots, \tau_{j_1+j_2}$ , each of which happens with probability  $1-p^*$ , and must be updated at round  $\tau_{j_1+j_2+1}$  which happens with probability  $p^*$ .

Therefore, we have

$$\begin{aligned}
 & \mathbb{E} \left[ \sum_{t=\eta_{q,k}+1}^{\eta_{q,k+1}} \mathbb{I}\{\mathcal{E}_{Z,1}(\boldsymbol{\theta}(t)), \mathcal{E}_{Z,2}(\boldsymbol{\theta}(t))\} \right] \\
 &= \sum_{j_1=0}^{\infty} \Pr[\eta_{q,k} = \tau_{j_1}] \sum_{j_2=0}^{\infty} \Pr[\eta_{q,k+1} = \tau_{j_1+j_2+1} | \eta_{q,k} = \tau_{j_1}] \\
 & \quad \times \sum_{j=j_1}^{j_1+j_2} \mathbb{E} \left[ \sum_{t=\tau_j+1}^{\tau_{j+1}} \mathbb{I}\{\mathcal{E}_{Z,1}(\boldsymbol{\theta}(t)), \mathcal{E}_{Z,2}(\boldsymbol{\theta}(t))\} \middle| \eta_{q,k} \leq \tau_j < \eta_{q+1,k} \right] \\
 &\leq \sum_{j_1=0}^{\infty} \Pr[\eta_{q,k} = \tau_{j_1}] \sum_{j_2=0}^{\infty} p^*(1-p^*)^{j_2} \sum_{j=j_1}^{j_1+j_2} \left( \prod_{i \in Z} B_q - 1 \right) \\
 &= \sum_{j_1=0}^{\infty} \Pr[\eta_{q,k} = \tau_{j_1}] \sum_{j_2=0}^{\infty} p^*(j_2+1)(1-p^*)^{j_2} \left( \prod_{i \in Z} B_q - 1 \right) \\
 &= \sum_{j_1=0}^{\infty} \Pr[\eta_{q,k} = \tau_{j_1}] \frac{1}{p^*} \left( \prod_{i \in Z} B_q - 1 \right) \\
 &= \frac{1}{p^*} \left( \prod_{i \in Z} B_q - 1 \right)
 \end{aligned} \tag{26}$$

where (26) holds due to our observations and (16) in Fact 3.

Finally, we have

$$\begin{aligned}
 \sum_{t=1}^T \mathbb{E}[\mathbb{I}\{\mathcal{E}_{Z,1}(\boldsymbol{\theta}(t)), \mathcal{E}_{Z,2}(\boldsymbol{\theta}(t))\}] &\leq \sum_{q=0}^T \sum_{k=0}^{|Z|-1} \mathbb{E} \left[ \sum_{t=\eta_{q,k}+1}^{\eta_{q,k+1}} \mathbb{I}\{\mathcal{E}_{Z,1}(\boldsymbol{\theta}(t)), \mathcal{E}_{Z,2}(\boldsymbol{\theta}(t))\} \right] \\
 &\leq \sum_{q=0}^T \sum_{k=0}^{|Z|-1} \frac{1}{p^*} \left( \prod_{i \in Z} B_q - 1 \right) \\
 &= \frac{|Z|}{p^*} \sum_{q=0}^T \left( \prod_{i \in Z} B_q - 1 \right) \\
 &\leq 13\alpha'_2 \cdot \frac{|Z|}{p^*} \cdot \left( \frac{2^{2|Z|+3} \log \frac{|Z|}{\varepsilon^2}}{\varepsilon^{2|Z|+2}} \right)
 \end{aligned} \tag{27}$$

where (27) holds due to (17) in Fact 3.
